# Supplementary material
Source: Research Square preprint supplement (doi:10.21203/rs.3.rs-8676149/v1)

Table S1. Circular Cutting Score Sheet

| Circular Cutting Score Sheet (Time limit: 2 minutes) | | | | | |
| --- | --- | --- | --- | --- | --- |
| **Participant Number** | |  | |  | |
| **Machine Number** | |  | |  | |
| Scoring Items | Scoring Criteria | Laps completed, black border status | Score | Laps completed, black border status | Score |
| Completion  (70 points) | Dividing the circle into four equal parts, completing less than half a circle, scores 0 points. |  |  |  |  |
| Complete ≥1/2 to <3/4 of a turn, scored as 40 points. |  |  |  |  |
| Complete ≥3/4 to less than 1 full revolution: 60 points |  |  |  |  |
| Complete one lap of shearing, totaling 70 points. |  |  |  |  |
| Technical  (30 points) | Surface finish: When cutting out the circle, both the inner and outer rings show no black ring gaps, and the edges are generally smooth (25-30 points). |  |  |  |  |
| Black ring gaps: For each gap found in either the inner or outer ring when cutting out the circle, deduct 5 points from the technical score until the deduction is complete. |  |  |  |  |
| Black Ring Fracture: For each instance of fracture in either the inner or outer ring without a gap, deduct 3 points. Continue deducting technical points until the total deduction is complete. |  |  |  |  |
| Bonus | For those completing within 2 minutes, 1 point is awarded for every 2 seconds saved.  (Example: 1 minute 45 seconds saves 8 points) |  |  |  |  |
| **Total** | |  | |  | |
| **Judge's Signature** | |  | | | |

Table S2. Passing soybeans score sheet.

| Passing Soybeans Score Sheet (Time limit: 2 minutes) | | | | | |
| --- | --- | --- | --- | --- | --- |
| Project Requirements:  1. A total of 25 soybeans and 20 vertical posts. Using the gripping tool, pick up one soybean from the small dish. Transfer it via the apparatus (separation tool) and place it atop a fixed vertical post.  2. Successfully pick up and transfer 20 soybeans. Soybeans dropped during picking or transfer will not be counted toward the score and will not incur penalty points. | | | | | |
| **Participant Number** | |  | |  | |
| **Machine Number** | |  | |  | |
| Scoring Items | Scoring Criteria | Number of pieces | Score | Number of pieces | Score |
| Completion  (100 points) | Successfully complete the soybean transfer, 5 points per bean. |  |  |  |  |
| Bonus | For every 20 columns completed within 2 minutes, 1 point is awarded for every second of remaining time (e.g., 1 minute 45 seconds completed earns 15 bonus points). |  |  |  |  |
| **Total** | |  | |  | |
| **Judge's Signature** | |  | | | |

Table S3. Fixed-point suturing score sheet.

| **Fixed-point Suturing S**core Sheet.(Time limit: 5 minutes) | | | | | |
| --- | --- | --- | --- | --- | --- |
| **Participant Number** | |  | |  | |
| **Machine Number** | |  | |  | |
| Scoring Items | Scoring Criteria | Number of stitches completed | Score | Number of stitches completed | Score |
| Completion  (70 points) | Incomplete suturing (suture not fully within the model) 0 points |  |  |  |  |
| Suturing completed (needle has passed through the model, all suture material is inside the model), but knotting not completed. 5 points per stitch. |  |  |  |  |
| Suturing completed (the needle has passed through the model, and all suture material is now inside the model). Complete surgical knot tying. Each suture receives 10 points. |  |  |  |  |
| Suturing completed (needle has passed through the model, all suture material is inside the model), surgical knot tied with reverse knot technique. 15 points per stitch. |  |  |  |  |
| Suturing completed (needle has passed through the model, all suture material is now inside the model). Completed 2-1-1 knot (surgical knot - reverse knot - forward knot). 25 points per stitch. |  |  |  |  |
| Technical  (25 points) | (10-12 points) Stitching is precise, knots are tied correctly and with appropriate tension. |  |  |  |  |
| (6-9 points) Stitching is still precise, knotting method is generally correct, and tension is relatively appropriate. |  |  |  |  |
| (3-5 points) Issues with suture precision or knot tying technique and tightness |  |  |  |  |
| (1-2 points) Issues exist with suture precision, knot tying technique, and tension control. |  |  |  |  |
| The length of thread tail remnants is appropriate, ranging between 3-5mm with consistent dimensions; 13-10 points  Most thread tail remnants measure between 3-5mm, though some exhibit slight variations in length; 7-9 points  Most thread tail remnants fall outside the 3-5mm range, but lengths are generally uniform; 3-6 points  Most thread tail remnants fall outside the 3-5mm range with noticeable length discrepancies. 1-2 points |  |  |  |  |
| Bonus | For those completing 3 sutures within 5 minutes, 1 point is added for every 2 seconds of remaining time (e.g., 4 minutes 45 seconds: rounded up to 8 points). |  |  |  |  |
| **Total** | |  | |  | |
| **Judge's Signature** | |  | | | |

Figure S1. A picture of a soybean to show its size.


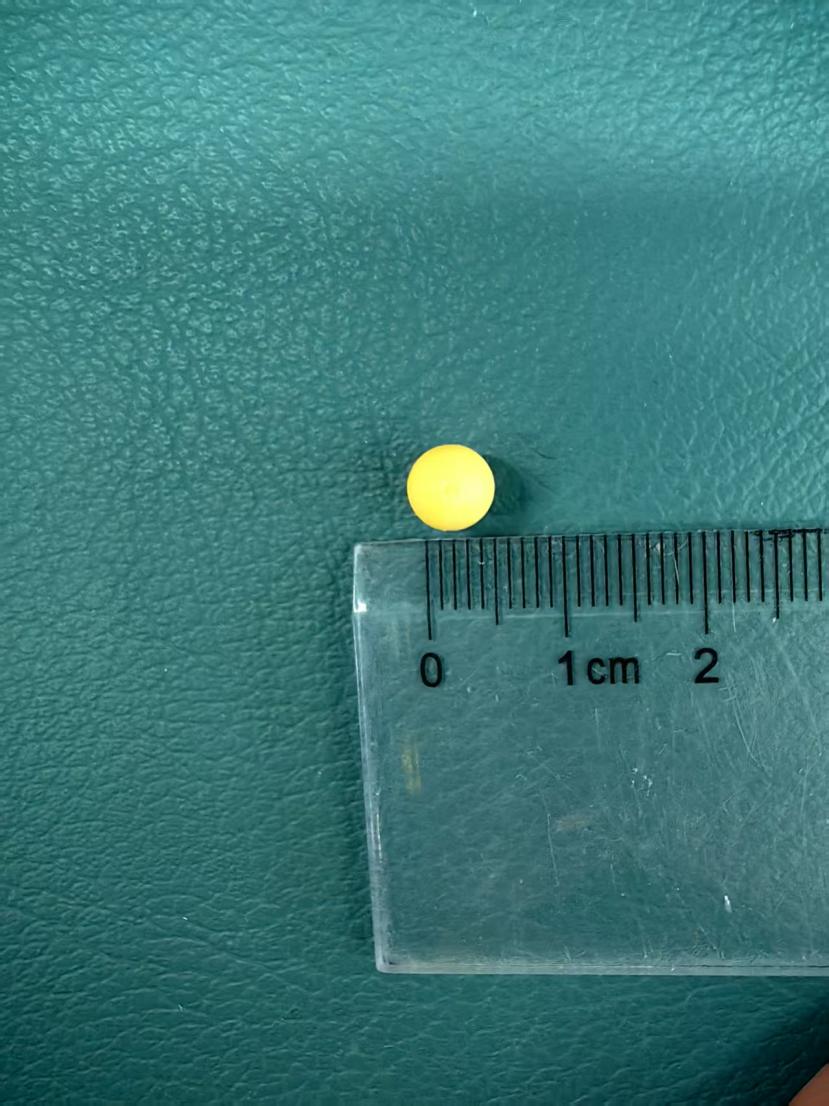

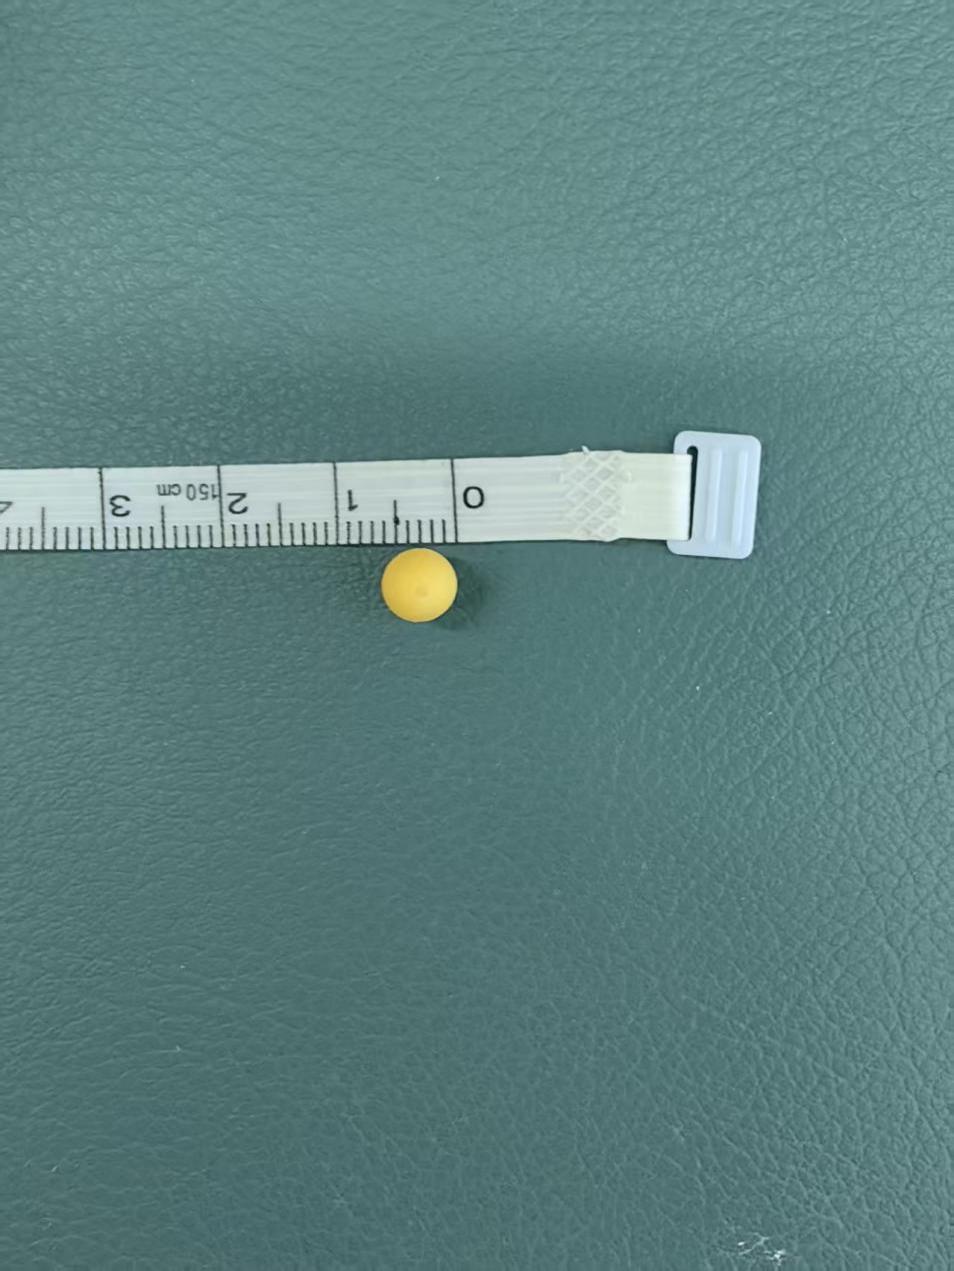

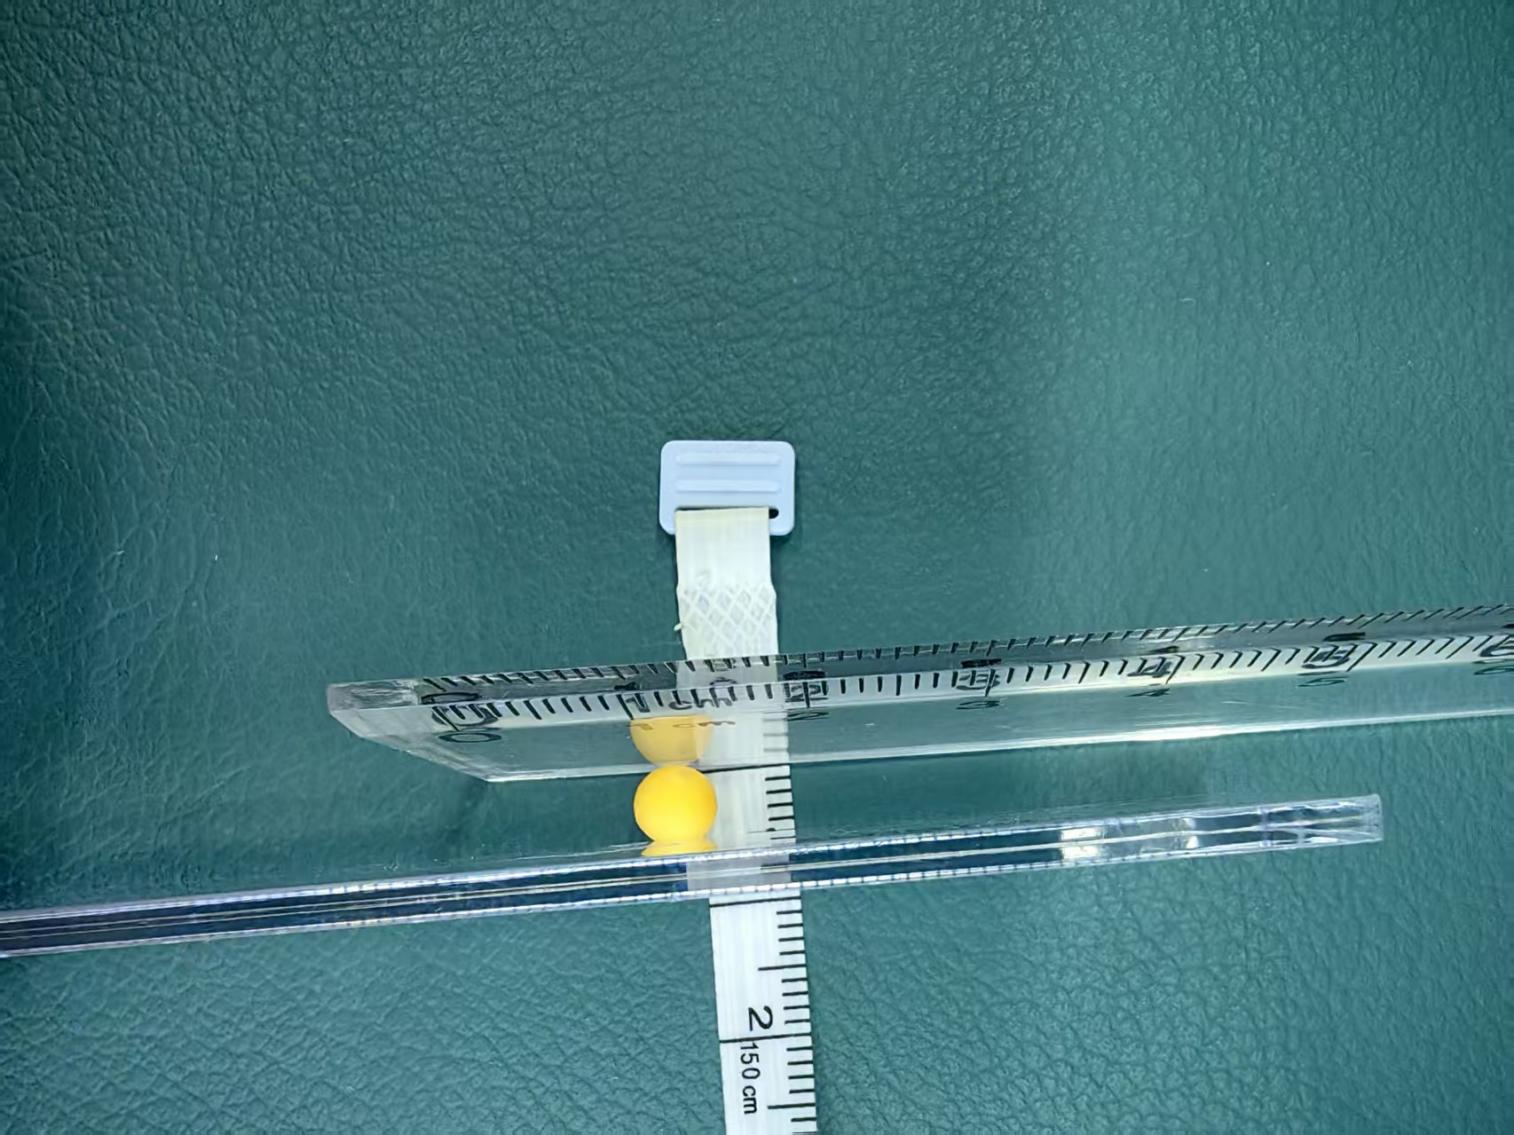

Supplement: Supplementary file 1 [file 30861859cbf204479fc3d806.docx]
